1     **Dendritic cell CX3CR1 and macrophages F4/80 play a central role in between gut**  
2                     **micro biome and inflammation in Arsenic induced mice**

3     **Chiranjeevi Tikka<sup>1</sup>**, Ram Kumar Manthari, Ruiyan Niu<sup>1</sup>, Zilong Sun<sup>1</sup>, **Jundong**  
4     **Wang<sup>1\*</sup>**

5         1. Shanxi Key Laboratory of Ecological Animal Science and Environmental  
6             Veterinary Medicine, College of Animal Science and Veterinary Medicine,  
7             Shanxi Agricultural University, Taigu-030801, Shanxi, China.

8         2. Department of Biotechnology, GITAM Institute of Science, GITAM University,  
9             Visakhapatnam-530045. Andhra Pradesh, India.

10

11     **\*Corresponding author:** Prof. Jundong Wang, Shanxi Key Laboratory of Ecological  
12     Animal Science and Environmental Veterinary Medicine, College of Animal Science and  
13     Veterinary Medicine, Shanxi Agricultural University, Taigu-030801, Shanxi, China;  
14     Mobile No: +86 13603546490; Tel.: +86-354-6288206; Fax: +86- 354-6222942

15     E-mail: [wangjd53@outlook.com](mailto:wangjd53@outlook.com)

16     **Abstract**

17             Microbiota plays a crucial role to protect the intestine contrary to the harmful  
18     foreign microorganisms and organize the immune system via numerous mechanisms,  
19     which include either direct or indirect environmental factors. The underlying mechanism  
20     arsenic (As) influenced immune system and regulates inflammation by altering gut  
21     microbiome in ileum remains unclear. However, chronic exposure to arsenic (at doses of  
22     0.15 mg or 1.5 mg or 15 mg As<sub>2</sub>O<sub>3</sub>/ L in drinking water) significantly increased mRNA  
23     and protein levels of F4/80 and CX3CR1, concurrently, the increased levels of mRNA  
24     and protein IFN $\gamma$ , TNF $\alpha$ , IL-18 and decreased levels of IL-10 were found in both 3 and  
25     6 months exposure periods. High-throughput sequencing analysis revealed that gut  
26     microbiota at phylum; family and taxonomical levels were showed the abundance of gut  
27     microbiota. Evidentially, the ultra-structure of intestinal villi, microbes engulfed and  
28     immune cell migration were showed by the transmission electron microscopy. Chronic  
29     exposure to As influenced the inflammation by changing immune system and altered gut

30 microbiota. In this study we conclude that chronic exposure to As breakdown the normal  
31 gut microbial community and increase the pathogenicity, the resultant risk pathogen  
32 direct contact with intestinal immune system and regulate the inflammation.

33 **Key words:** Arsenic, Immune system, Inflammation, Micro biome, Pathogen.

### 34 **1. Introduction:**

35 Arsenic (As) is a one of the most dangerous chemical toxic factor in the  
36 environment; it is widely distributed in the natural weathering of the earth's crust.  
37 Likewise, it certainly develops linked with water, soil, food and particulates in the air  
38 (Nordstrom et al., 2002). Moreover, the arsenic contaminate can occur in the region of  
39 mining and industrial arsenic application by the human being [Williams et al., 2001]. The  
40 sever exposure to high dose of As is more toxic to most cellular life forms, and prolonged  
41 low dose exposure in human being, is also linked with several disease. The community of  
42 microorganisms is called microbiome, which residing in a well-defined environment and  
43 the quantity of their physical, biological and ecological activities (Whipps et al., 1988).  
44 The human body contains trillions of microbiome, which taxonomically described as  
45 micro-eukaryotes, archea, virus, bacteria and fungi. It is ultimately linked between the  
46 abiotic environment, mcrobiome and host cells have substantial influences on human  
47 health and disease (Clemente et al., 2012). In this study we focus on alteration of gut  
48 microbiome influence inflammation via disruption of intestinal immune system in  
49 chronic exposure of arsenic.

50 The specific function of mucosal immune system is mainly self-growing of the  
51 universal immune system (Woof et al., 2006) and it ultimate changes occurs after  
52 bacterial migration of the gastro intestinal tract (Scheppach et al., 1994). The immune  
53 system maturation is depends on commensal microorganisms, which study to separate  
54 between commensal bacteria and pathogenic bacteria (Thaiss et al., 2016; Nakanishi et al.,  
55 2015). For the development of mucosal immune system in the intestinal epithelial cells  
56 and lymphoid cells by the active function of Toll-like receptors (TLRs). The role of TLRs  
57 to inhibits the inflammatory response and stimulates immunological tolerance to typical  
58 microbiota components. Moreover, gut microbiota control neutrophil passage, function

59 (Owaga et al., 2015) and disturb the immune cell populations into different types of  
60 helper cells (Th), such as Th1, Th2, and Th17 or into regulatory T cells (Francino et al.,  
61 2014).

62 The helper cells of Th17 cells are subclass of TCD4+ cells, which secrete  
63 numerous cytokines (IL-17A, IL-17F and IL-22), with a substantial influence on immune  
64 homeostasis and inflammation (Rossi et al., 2013; Sonnenberg et al., 2011). Typically  
65 stimulate macrophages secretes a huge volume of IFN- $\gamma$ , TNF- $\alpha$ , IL-6, and IL-12 and  
66 express inflammatory and anti-inflammatory activities. Anti-inflammatory IL-10 plays an  
67 important role in the activation of Macrophages especially in the region of intestine, in  
68 addition IL-10 plays crucial role in the deletion of inflammation, which associate with  
69 hyper responsiveness of macrophages (Rivollier et al., 2012; Hirotsani et al., 2005; Takeda  
70 et al., 1999; Ueda Y et al., 2010; Kühn R; Löhler., et al., 1990; Zigmund E et al., 2014;  
71 Shouval DS., 2014). In this study we report that chronic exposure to Arsenic induced  
72 inflammation by the hyper expression of Macrophages (F4/80) and dendritic cells  
73 (CX3CR1) that stimulated inflammatory (TNF- $\alpha$ , sIFN- $\gamma$  and IL-18) cytokines while  
74 suppressing the anti-inflammatory (IL-10) cytokines through the altered gut microbiome  
75 in the region of Ileum. However, expression of macrophages, dendritic cells and  
76 inflammatory and anti-inflammatory cytokines significantly increased and depletion  
77 levels were found at dose dependent which associated with gut microbiome alterations.

## 78 **2. EXPERIMENTAL METHODOLOGY AND MATERIALS**

### 79 **2.1. Animal exposure and Maintenance**

80 120 male Kunming mice of 6 weeks age were purchased from Experimental  
81 Animal Centre, Academy of Military Medical Sciences, China. All mice were allowed  
82 two weeks for environmental adaptation, maintained at 22°C, 45-65% humidity, and a  
83 12:12 hrs dark: light cycle before commencement of the experiment. During this period,  
84 mice were received only deionized water and pelleted rodent diet. After completion of the  
85 two weeks of environmental adaptation, the mice were allocated into two groups for two  
86 different exposure periods (3 months and 6 months; containing 60 mice each). 60 mice  
87 from each exposure period, were randomly divided into four groups (each group

88 containing 15 mice) as control (received only Distilled H<sub>2</sub>O), low (0.15 mg As<sub>2</sub>O<sub>3</sub>/L),  
89 medium (1.5 mg As<sub>2</sub>O<sub>3</sub>/L) and high (15 mg As<sub>2</sub>O<sub>3</sub>/L) dose. As-containing distilled  
90 water and pelleted rodent diet were provided twice in a week. Each mouse drink about 10  
91 mL/day on an average daily, which resulted in intake of 1.5 µg, 15 µg and 150 µg per  
92 mouse per day in low, medium and high groups respectively. These doses have been  
93 chosen according to previous studies [37] and based on environmental concentrations of  
94 As or surveillance of realistic exposure doses for humans, every group has housed in a  
95 microbe's free cages on heat-treated hardwood bedding. All the experimental procedures  
96 have been accepted by the Animal Welfare International Ethics Committee, Shanxi  
97 Agricultural University, China.

## 98 **2.2. Histological studies**

99 After completion of the two exposure periods (3 months and 6 months), the mice  
100 were sacrificed and dissected entire small intestine. Then ileum part was separated and  
101 then fixed in formalin solution (10%) for 24–28 h. Next the formalin fixed samples were  
102 dehydrated in an alcohol grade series and then fixed in paraffin wax. Prepared sections  
103 (4–5µM thickness) have been stained through hematoxylin–eosin for histopathological  
104 studies.

## 105 **2.3. Immunohistochemistry (IHC) and Immuno fluorescence (IF)**

106 For immunohistochemistry, H&E standard procedure was followed, and then  
107 ileum sections were incubated with primary antibody for CX3CR1 (1:200; abcam  
108 [ab8021] purchased from Saiao, China), CD11a (1:200; biorbyt orb [385445] UK),  
109 CD103 (1:200; Absin [118723] purchased from Saiao, China), F4/80 (1:200; Cell  
110 signaling technology, [Q61549] US, purchased from Saiao, China), NOD2 (1:200; Novus  
111 Biologicals, NB100-524SS), and APC (1:200; Abcam [ab15270], purchased from Saiao,  
112 China), for 30 mins, and then stained with diaminobenzidine followed by hematoxylin.  
113 Negative controls were incubated only secondary antibody; and showed no significant  
114 staining from all cases. Images were captured through Nikon Labophot 2 microscope  
115 (ImagePro Plus 3.0, ECLIPSE80i/90i; Nikon, Japan), analyses were performed for  
116 expression levels of F4/80, CD11a, CD103, CX3CR1.

117 Immunofluorescence was performed as already described procedure [38]. Briefly,  
118 sections were incubated with primary antibody NOD2 (1:100) and APC (1:100) over  
119 night at 4°C, then conjugated secondary antibody (Goat anti mouse Alexa Fluor 594 for  
120 NOD2, Donkey anti Rabbit for APC Alexa Fluor 488) respectively at room temperature  
121 for 1 hr in the dark and then covered slip with DAPI medium. Images were taken by  
122 Nikon Labophot 2 microscope (ImagePro Plus 3.0, ECLIPSE80i/90i; Nikon, Japan).

#### 123 **2.4. Tissue preparation for TEM analysis**

124 Ileum (Control and high dose group of 6 months only) was separated from the  
125 small intestine and then fixed at room temperature (RT) for 2 hrs. Then, the ileum tissues  
126 were washed with PBS, and then post-fixed with osmium tetroxide for 2 hrs at room  
127 temperature, followed by 10 min pre-staining in acetate-barbitone. After that dehydrated  
128 by graded ethanol, the samples were fixed in Spurr's resin. Sections were stained with  
129 uranyl acetate and lead citrate, and then ultra-structure of dendritic cell migration and  
130 bacteria were observed through the JEM-1400 (JEOL Ltd., Tokyo, Japan) TEM.

#### 131 **2.5. Bacterial DNA Isolation and 16S rRNA gene Sequencing**

132 During necropsy, mice fecal pellets were collected from the 6 months As exposed  
133 mice and then total bacterial DNA was extracted from fecal pellets by using power soil  
134 DNA isolation kit (MO BIO Laboratories, Beijing, China). The DNA purity and quantity  
135 was estimated at 260/280 nm and 260/230 nm respectively and then sample were  
136 preserved at -800C for further analysis. The bacterial 16S rRNA gene (V3 or V6 region)  
137 was amplified twice with the suitable thermal cycling conditions and primers (Forward  
138 primer, 5'-ACTCCTACGGGAGGCAGCA-3'; reverse primer, 5'-  
139 GGACTACHVGGGTWTCTAAT-3'). Finally, the PCR products were analyzed through  
140 Quant-iT™ dsDNA HS Reagent and then pooled together. High-throughput sequencing  
141 analysis of bacterial rRNA genes was performed on the purified, pooled sample using the  
142 Illumina Hiseq 2500 platform (2×250 paired ends) at Biomarker Technologies  
143 Corporation, Beijing, China. This method already described in our previous studies (40).  
144 (Chiranjeevi et al., 2020)

#### 145 **2.6. Separation of epithelial cells from intestine for mRNA extraction**

146            Epithelial cells from ileum were isolated. Briefly, ileum part was separated from  
147 the entire small intestine and placed in cold PBS. The ileum tissues were flushed with  
148 cold PBS to wash, using 3 ml insulin syringe. Pieces were incubated in 50-100 ml of  
149 0.04% sodium hypochlorate on ice for 15 min to avoid bacterial contaminations. Later  
150 intestinal pieces from sodium hypochlorate solution were rinsed in PBS and then  
151 incubated in 15 ml conical tube containing solution B for 15 min on ice. Solution B was  
152 discarded and then washed with 5ml of PBS or solution B for two times. Then the  
153 intestinal pieces were transferred to another conical tube (containing solution B) and then  
154 centrifuged at 1,000 rpm (4°C) for 15min. Then, the cells contained pellet was suspended  
155 in 1 ml of Trizole for RNA extraction.

## 156 **2.7. Extraction of mRNA from epithelial cells and Real-time-qPCR**

157            Total RNA was isolated from epithelial cells by using Trizole Reagent according  
158 to manufacture instructions and then checked their intensity through agarose gel  
159 electrophoresis and the RNA quality and quantities were identified through Nanodrop  
160 ND-1000 Spectrophotometer. The RNA was converted to cDNA through the reverse  
161 transcription PCR according to the manufacturer's instructions (PrimeScript® RT Master  
162 Mix Kit). The expression levels of genes were quantified by qRT-PCR used by SYBER  
163 Premix Ex Taq™ II QRT-PCR kit performed through the Mx3000PTM RT-PCR system,  
164 with the suitable primers and thermal profile conditions. This experiment has been done  
165 in triplicate, and then obtained raw data was analyzed by the  $2^{-\Delta\Delta C_t}$  method.

## 166 **2.8. Protein extraction and analysis of cytokines by ELISA**

167            For ELISA analysis, protein content was isolated by adding 2 ml of PBS  
168 (containing 0.1% PMSF) to the intestinal epithelial cells and then allowed to incubate for  
169 10 min under ice condition for the disruption and then centrifuged at  $\sim$ 15000 rpm for 10  
170 min. The resultant protein supernatant thus obtained was stored at -300C for further  
171 process. The anti and inflammatory cytokines (TNF- $\alpha$ , IFN- $\gamma$ , IL-18 and IL-10) were  
172 analyzed through ELISA method according to the manufacture instructions (Westang  
173 Biotech Co. Ltd, Shanghai, China). Finally, the plates were read by SCO GmbH  
174 (Dingelstadt, Germany). The absorbance obtained from plate reader was transformed to

175 cytokine concentrations (pg/ml) and then determined protein concentration by using a  
176 standard curve computed on Excel. The sensitivities for all cytokines were between 4 to 6  
177 pg/ml.

### 178 **3. Statistical analysis**

179 All the experimental data has shown by the mean  $\pm$  SEM and calibrated with  
180 software (GraphPad Software Inc., San Diego, USA) of Prism 5 GraphPad. Significant  
181 changes between the control and treatment groups were analyzed by one-way ANOVA  
182 followed by a Tukey's Multiple Comparison test. The considered significant statistical  
183 value is  $p < 0.05$ . Moreover, for the microbiome overlap relation between paired-end (PE)  
184 reads, the double-end sequence data was obtained by Hiseq sequencing merged into  
185 sequence tags, quality of reads; effect of merge quality controlled and filtered was  
186 analyzed by FLASH v1.2.7, Trimmomatic v0.33, and UCHIME v4.2 software  
187 respectively. OTU (Operational Taxonomic Unit) analysis UCLUST[2] in QIIME[1]  
188 (version 1.8.0) software was used to cluster the tags and obtain OTU at 97% similarity  
189 level, and then prepared taxonomic annotation of OTU based on Silva (bacteria) and  
190 UNITE (fungi) taxonomic database. In addition, the sequences of OTU with the highest  
191 abundance at the taxonomic level were selected with the QIIME software as the  
192 representative sequences, and then the multiple sequence alignment was conducted and  
193 the phylogenetic tree was constructed. Then the graph was drawn with the Python  
194 language tool, Mothur (version v.1.30) software was used to evaluate the sample Alpha  
195 diversity index.

## 196 **4. RESULTS**

### 197 **4.1. Gut-microbiome alterations induced by As**

198 Figure 1 revealed that abundance of gut bacteria indicated at family level  
199 through the 16S rRNA sequencing states, each color indicating a specific bacterial family.  
200 Among the bacterium allocating level of phylum, Bacteroidetes (60.04%) and Firmicutes  
201 (30.10%) were predominant in the gut bacteria of mice, followed by Proteobacteria  
202 (8.58%), Deferribacteres (0.56%), Actinobacteria (0.31%), Tenericutes (0.29%), and  
203 Saccharibacteria (0.11%). Our results at phylum level are in correlation with earlier



204 studies by Turnbaugh et al. (2006). Significant fold changes ( $p < 0.05$ ) and taxonomical  
205 assignment of gut bacterial components were recorded in figure (1E). Impact of As on the  
206 alteration of gut microbiome was significant in high dose group (Fig 1G) when compared  
207 with the control group. Control and As exposure animals were well differentiated with  
208 41.04% and 31.20% variation, this variation demonstrated through principal component 1  
209 and 2, respectively. Control and As exposure animals clustered in their individual groups,  
210 were demonstrated through the PCoA plot, by the analysis of evolutionary diversity  
211 UPGMA, as shown in figure 1D. Moreover, control mice divided into two subgroups in  
212 the PCoA plot (Fig. 1 G) and UPGMA analysis (Fig. 1D), which could be due to the own  
213 differentiation of microbiome profiles, as demonstrated in figure 1A.

#### 214 **4.2. Dendritic cells tried to engulf the pathogenic bacterium**

215 The dendritic cells (DCs) migrate from epithelium to lumen and protect from the  
216 pathogenic bacteria across through the epithelial barrier (Nicoletti, 2000). In this study,  
217 we have pursued the ultra-structure of intestinal dendritic cells (DCs), macrophages and  
218 bacterial mobilization. Here, we reported the dendritic cells ultra-structure and their  
219 migration in 6 months As exposed mice intestine. Our results showed that there was no  
220 cellular extension and bacterial structure found in control group (Fig. 2A), while  
221 ultrastructure of cellular extension (Fig. 2B) trying to engulf the bacterium (Fig. 2C), at  
222 epithelial cells into the intestinal lumen was observed in As treated group. Not only the  
223 dendritic cell extension and also bacterium crossing the epithelium barrier (Fig. 2D) to  
224 penetrate the cell (Fig. 2E) and fine ultra-structure of macrophage migration (Fig. 2F)  
225 were observed in As treated groups. We observed fine ultra-structure of cellular  
226 organelles in control group, while the ultimate structure of dendritic cell, macrophages,  
227 bacterial structures and their mobility in As treated group.

#### 228 **4.3. Interrelation between gut micro biome and macrophage (M $\Phi$ ) F4/80 and** 229 **CX3CR1**

230 The mRNA expression, protein distribution and intensity pattern were  
231 investigated from all four groups through qRT-PCR, immunohistochemistry respectively.  
232 In this study, we have studied intestinal immune proteins such as macrophage (M $\Phi$ )



233 F4/80 (Fig. 3) and dendritic cell CX3CR1 (Fig. 4). Based on As dose, MΦ and dendritic  
234 cells were expressed, however the mRNA levels of F4/80 (Fig. 3G, N) and CX3CR1 (Fig.  
235 4F, M) were significantly increased, moreover the protein intensity F4/80 (Fig. 3A, B, C,  
236 D, E, F, H, I, J, K, L, M) and CX3CR1 ( Fig. 4A, B, C, D, E, G, H, I, J, K, L, N) were  
237 significantly distributed both in 3 and 6 months exposure period. But there was no  
238 significant differences of F4/80 protein intensity were found in low dose group of both 3  
239 and 6 months exposure mice, while during there was no significant different in 3 months  
240 low dose group of CX3CR1 protein intensity but not in 6 months. These differences were  
241 explains some animals may addicted to the arsenic due to the prolonged exposure.

#### 242 **4.4. The inflammatory cytokines secreted by the altered dendritic cells**

243 Influence of As on the levels of anti-inflammatory and inflammatory cytokines  
244 (IFN- $\gamma$ , IL-18, TNF- $\alpha$  and IL-10) were quantified through the qRT-PCR (Fig.5A, B, C, D,  
245 E, F, G, H, I, J, K, L, M, N, O, P). Our results revealed that IFN- $\gamma$ , IL-18 and TNF- $\alpha$  were  
246 significantly increased (Fig. 5), with a concomitant decrease in IL-10 (Fig-5I, J, K, L) in  
247 both 3 and 6 months exposure animals. But, no significant differences were identified in  
248 case of IFN- $\gamma$  protein in low dose of 3 and 6 months (Fig. 5C, D), TNF- $\alpha$  mRNA in low  
249 dose group of 3 and 6 months (Fig.5E, F); IL-18 mRNA level in both in 3 and 6 months  
250 low dose exposed groups (Fig. 5M, N) and IL-10 in 3 and 6 months low dose exposed  
251 groups (Fig.5I, J, K). Interestingly, dose- and time-dependent effect of As was observed,  
252 i.e., among the three different As doses, high dose showed significant effect when  
253 compared with other two doses and moreover, among the two exposure periods studied,  
254 the mRNA expression levels were found to be higher in the 6 months age group (Fig. 5)  
255 compared with the 3 months age group.

#### 256 **5. DISCUSSION**

257 In general, humans are being exposed to very low doses of As, hence to maintain  
258 a rationale with environmental As levels, in this study, we have exposed mice with 0,  
259 0.15, 1.5, 15 ppm As<sub>2</sub>O<sub>3</sub> for 3 and 6 months to evaluate the impact of As on gut  
260 microbiome and immune system. The present study has been revealed that impact of As  
261 exposure on the gut microbiota, immune system and its mechanism associated with

262 inflammation in small intestine of Ileum. Our data clearly indicated that prolonged  
263 exposure of As changed immune system and regulate inflammation through the alteration  
264 of gut microbial compositions. In previous studies we provided that arsenic deregulates  
265 NOD2 (Nolan Maier et al., 2014) and altered gut microbiome leads to change the  
266 immune system and influence the colon cancer marker in small intestine of Jejunum (Lu  
267 et al., 2014), Our results provided mechanistic visions regarding alteration of the gut  
268 microbiome to disrupt immune system which acts as a novel mechanism of  
269 environmental factors-induced human diseases like cancer.

270 The accumulating evidence suggests that As exposure is linked to altered gut  
271 microbiota in children (Dong et al., 2017). Exposure to As significantly depleted alpha  
272 diversity in the gut microbiota with a decrease in the bacterial population (Liang Chi et  
273 al., 2017). These alterations in the bacterial population could significantly dysregulate the  
274 normal gut microbiome functions (Kashyap et al., 2013). Recent studies revealed that  
275 repeated doses during early development or adulthood altered gut microbiome linked  
276 with immune disruption (Gokulan et al., 2018). Moreover, several other recent studies  
277 reported that small intestinal and cecal microbiome alterations (Viaud et al., 2013; Mireia  
278 et al., 2018), while the fecal microbiota altered significantly in our study. In consistent  
279 with these views, we reported that high As dose altered gut microbiome, while, low dose  
280 As doesn't.

281 The microbiome is essential to organize intestinal homeostasis. Here we evaluated  
282 gut microbiome alterations influenced by the arsenic through high-throughput 16S rRNA  
283 gene sequencing. In this study our results clearly showed that chronic exposure to arsenic  
284 not only altered gut microbial composition and also changed the intestinal homeostasis,  
285 these changes strongly associate with the cytokines modifications. But previous studies  
286 provided that arsenic showed impact on gut microbiome alterations and its perturbed gut  
287 microbiome strongly associate with changes of many microbial floras ((Lu et al., 2014).  
288 Recent studies reviewed that microbiota plays a vital role in the initiation, training and  
289 function of the host immune system (Belkaid et al., 2014). The germ-free (GF) animals or  
290 any other models organism were not exposed to any pathogenic microbes and thus have a  
291 dominant innate and adaptive immune system (Smith et al., 2007).

292 The gut microbiome regulates immunomodulatory functions through their  
293 interactions with TLRs expressed on the surfaces of epithelial cells and DCs (Abreu et al.,  
294 2010) and different bacteria stimulate different and distinct TLRs on host cells  
295 (Vanderpool et al., 2018). The dysbiosis of microbiota regulates  $\gamma\delta$ T17 cells by the  
296 activation of CD103+ leading to drive total monoclonal expansion (Fleming Chris et al,m  
297 2017). Here, we proved that the dysbiosis of microbiota activated DCs which stimulates  
298 the inflammatory cytokines production while depleted anti-inflammatory cytokines. In  
299 this study, exposure to As revealed that dysbiosis of microbiota activated macrophages  
300 (F4/80), and DCs (CX3CR1) to produce inflammatory initiators (IFN- $\gamma$ , TNF- $\alpha$ , and  
301 IL-18) and anti-inflammatory cytokine (IL-10). The imbalance in immune system leads  
302 to the secretion of inflammatory cytokines. Some of the other studies reported that  
303 increased production of interleukin IL-12 and IL-8 and TNF- $\alpha$  by DCs was significantly  
304 associated with survival (Vivek Subbiah et al., 2018). Fernanda et al., (2009) reported  
305 that TNF- $\alpha$ , and IL-12 were involved in the TLR4/Smteg interaction of MyD88 signaling  
306 pathway due to the activation of DCs by Smteg (Durães et al., 2009). Earlier studies  
307 showed that TNF- $\alpha$ , largely secreted by Ly6c+ CD11b+ dendritic cells (DCs), plays a  
308 vital role in promoting IL-17A from CD4+ T cells and associated to induce airway  
309 neutrophilia (Feia et al., 2011). There has been controversy with respect to dendritic cells  
310 such as macrophages, capable to produce IFN- $\gamma$  (De Saint-Vis et al., 1998). Previous  
311 reports illustrated that CD8a2 and CD8a1 splenic dendritic cells produced IFN-g in  
312 response to IL-12p70 (Ohteki et al., 1999), an effect that was inhibited by the  
313 accumulation of IL-4 or IL-18 (Fukao et al., 2000). Some of the studies reviewed that, the  
314 pro-inflammatory cytokines (Th1 and Th2) are produced by the cytokines and chemokine  
315 signaling pathway (Pierre Miossec et al., 2008). Such kind of inflammation initiators  
316 create cellular modifications that can promote to chronicity. The present report  
317 determined the regulatory mechanism of inflammatory interleukin and anti-inflammatory  
318 cytokine expressions by dendritic cells. IL-10, IL-18, IFN- $\gamma$  and TNF- $\alpha$  transcripts  
319 detected by real-time PCR were promptly up-regulated by dendritic cells CX3CR1 and  
320 macrophage F4/80 stimulation. Furthermore, IL-10 was depleted by the stimulation of  
321 dendritic cells and macrophage while regulated IL-18 IFN- $\gamma$  and TNF- $\alpha$ . These results

322 were correlated with previous studies by Xavier and Podolsky (Xavier et al., 2007). The  
323 gut inflammatory pathway regulates different types of cancers like colon and rectal  
324 cancer (Neuman 2007; Terzic et al., 2010). Moreover, addition of proinflammatory  
325 cytokines helps in the formation of inflammatory state in the colon and to promote colon  
326 and rectal cancer (Sanchez-Munoz et al., 2008).

327 Kristina et al., (2012) described the role of anti-inflammatory and inflammatory  
328 cytokines in colon and rectal cancers. Furthermore, recent reports evidenced that  
329 activation of  $\beta$ -catenin signaling in effector T cells and/or Trigs is causatively linked with  
330 the marking of proinflammatory properties and the upgrade of colon cancer (Shilpa  
331 Keerthivasan et al., 2014). Our results showed that As exposure altered gut microbiome  
332 composition and strongly associated with changed related microbial flora, regulate to  
333 activate macrophages and dendritic cells. The irregular function of intestinal homeostasis  
334 secreted the inflammatory cytokines in male mice and which provides mechanistic  
335 information to determine how chronic exposure of As influence on the gut microbiome,  
336 immune system and regulate inflammation.

## 337 **6. Conclusions**

338 In conclusion, we have proved that chronic exposure to arsenic strongly  
339 associated with inflammation. However, arsenic influenced the inflammation through the  
340 alteration of gutmicrobiome and changes of intestinal immune system. The dysbiosis of  
341 gut microbiota leads to significantly increased both mRNA and protein levels of  
342 macrophages (F4/80) and dendritic cells (CX3CR1) while decreasing the  
343 anti-inflammatory cytokines (IL-10) and increased level of inflammatory cytokines  
344 (IFN- $\gamma$ , TNF- $\alpha$ , and IL-18). Altered immune system and regulate the intestine  
345 inflammation, providing novel platform to determine how chronic exposure to As leads to  
346 various diseases. In previous studies we have reported on the alteration of gut fungus and  
347 immune system in the intestine part of Jejunum ( Chiranjeevi Tikka et al., 2020).

## 348 **Funding**

349 This study was funded by National Natural Science Foundation (NNSF), China (Grant  
350 Nos. 31672623 and 31372497).

351 **Notes**

352 The authors declare that there are no conflicts of interest

353 **References**

- 354 1. Nordstrom DK. Public health. Worldwide occurrences of arsenic in ground water.  
355 Science. 2002;296 (5576):2143–5. 10.1126/science.1072375. [PubMed: 12077387].
- 356 2. Williams M Arsenic in mine waters: an international study. Environ Geol.  
357 2001;40(3):267–78. 10.1007/s002540000162.
- 358 3. Whipps JMLK, Cooke RC. Mycoparasitism and plant disease control. Fungi in  
359 biological controlsystems: Manchester University Press; 1988.
- 360 4. Clemente JC, Ursell LK, Parfrey LW, Knight R. The Impact of the Gut Microbiota on  
361 Human Health: An Integrative View. Cell. 2012;148(6):1258–70.  
362 10.1016/j.cell.2012.01.035. [PubMed:22424233].
- 363 5. Woof JM, Kerr MA. The function of immunoglobulin A in immunity. J Pathol (2006)  
364 208(2):270–82. doi:10.1002/path.1877.
- 365 6. Scheppach W. Effects of short chain fatty acids on gut morphology and function. Gut  
366 (1994) 35:S35–8. doi:10.1136/gut.35.1\_Suppl.S35.
- 367 7. Thaïss CA, Zmora N, Levy M, Elinav E. The microbiome and innate immunity.  
368 Nature (2016) 535:65–74. doi:10.1038/nature18847.
- 369 8. Nakanishi Y, Sato T, Ohteki T. Commensal Gram-positive bacteria initiates colitis by  
370 inducing monocyte/macrophage mobilization. Mucosal Immunol (2015) 8:152–60.  
371 doi:10.1038/mi.2014.53.
- 372 9. Owaga E, Hsieh RH, Mugendi B, Masuku S, Shih CK, Chang JS. Th17 cells as  
373 potential probiotic therapeutic targets in inflammatory bowel diseases. Int J Mol Sci  
374 (2015) 16:20841–58. doi:10.3390/ijms160920841.

- 375 10. Francino MP. Early development of the gut microbiota and immune health.  
376 Pathogens (2014) 4:769–90. doi:10.3390/pathogens3030769.
- 377 11. Rossi M, Bot A. The Th17 cell population and the immune homeostasis of the  
378 gastrointestinal tract. Int Rev Immunol (2013) 32(5–6):471–4. doi:10.3109/  
379 08830185.2013.843983.
- 380 12. Sonnenberg GF, Fouser LA, Artis D. Border patrol: regulation of immunity,  
381 inflammation and tissue homeostasis at barrier surfaces by IL-22. Nat Immunol (2011)  
382 12(5):383–90. doi:10.1038/ni.2025.
- 383 13. Rivollier A, He J, Kole A, Valatas V, Kelsall BL. 2012. Inflammation switches the  
384 differentiation program of Ly6Chi monocytes from anti-inflammatory macrophages  
385 to inflammatory dendritic cells in the colon. J Exp Med 209:139 –155.  
386 <https://doi.org/10.1084/jem.20101387>.
- 387 14. Hirotani T, Lee PY, Kuwata H, Yamamoto M, Matsumoto M, Kawase I, Akira S,  
388 Takeda K. 2005. The nuclear I $\kappa$ B protein I $\kappa$ BNS selectively inhibits  
389 lipopolysaccharide-induced IL-6 production in macrophages of the colonic lamina  
390 propria. J Immunol 174:3650 –3657. <https://doi.org/10.4049/jimmunol.174.6.3650>.
- 391 15. Takeda K, Clausen BE, Kaisho T, Tsujimura T, Terada N, Forster I, Akira S. 1999.  
392 Enhanced Th1 activity and development of chronic enterocolitis in mice devoid of  
393 Stat3 in macrophages and neutrophils. Immunity 10:39–49.  
394 [https://doi.org/10.1016/S1074-7613\(00\)80005-9](https://doi.org/10.1016/S1074-7613(00)80005-9).
- 395 16. Ueda Y, Kayama H, Jeon SG, Kusu T, Isaka Y, Rakugi H, Yamamoto M, Takeda K.  
396 2010. Commensal microbiota induce LPS hyporesponsiveness in colonic  
397 macrophages via the production of IL-10. Int Immunol 22: 953–962.  
398 <https://doi.org/10.1093/intimm/dxq449>.
- 399 17. Kühn R, Löhler J, Rennick D, Rajewsky K, Müller W. 1993. Interleukin-10- deficient  
400 mice develop chronic enterocolitis. Cell 75:263–274.  
401 [https://doi.org/10.1016/0092-8674\(93\)80068-P](https://doi.org/10.1016/0092-8674(93)80068-P).

- 402 18. Zigmund E, Bernshtein B, Friedlander G, Walker CR, Yona S, Kim K-W, Brenner O,  
403 Krauthgamer R, Varol C, Müller W, Jung S. 2014. Macrophage restricted  
404 interleukin-10 receptor deficiency, but not IL-10 deficiency, causes severe  
405 spontaneous colitis. *Immunity* 40:720 –733.  
406 <https://doi.org/10.1016/j.immuni.2014.03.012>.
- 407 19. Shouval DS, Biswas A, Goettel JA, McCann K, Conaway E, Redhu NS, Mascanfroni  
408 ID, Al Adham Z, Lavoie S, Ibourk M, Nguyen DD, Samsom JN, Escher JC, Somech  
409 R, Weiss B, Beier R, Conklin LS, Ebens CL, Santos FGMS, Ferreira AR, Sherlock M,  
410 Bhan AK, Müller W, Mora JR, Quintana FJ, Klein C, Muise AM, Horwitz BH,  
411 Snapper SB. 2014. Interleukin-10 receptor signaling in innate immune cells regulates  
412 mucosal immune tolerance and anti-inflammatory macrophage function. *Immunity*  
413 40:706 –719. <https://doi.org/10.1016/j.immuni.2014.03.011>.
- 414 20. K. Nolan Maier, Devorah Crown, Jie Liu, H. Stephen, Leppla, Mahtab Moayeri,  
415 Arsenic Trioxide and Other Arsenical Compounds Inhibit the NLRP1, NLRP3, and  
416 NAIP5/NLRC4 Inflammasomes, *J Immunol.* 192 (2014) 763-770, Doi:  
417 10.4049/jimmunol.1301434.
- 418 21. K. Lu, R.P. Abo, K.A. Schlieper, M.E. Graffam, S. Levine, J.S. Wishnok, J.A.  
419 Swenberg, S.R. Tannenbaum, J.G. Fox, Arsenic exposure perturbs the gut  
420 microbiome and its metabolic profile in mice: an integrated metagenomics and  
421 metabolomics analysis, *Environ Health Perspect.* 122 (2014) 284–291,  
422 DOI:10.1289/ehp.1307429.
- 423 22. X. Dong, N. Shulzhenko, J. Lemaitre, R.L. Greer, K. Peremyslova, Q.  
424 Quamruzzaman, Mahmud Rahman, Omar Sharif Ibn Hasan, Sakila Afroz Joya,  
425 Mostofa Golam, C. David, Christiani, Andriy Morgun, L. Molly, Kile, Arsenic  
426 exposure and intestinal microbiota in children from Sirajdikhan, Bangladesh, *PLoS*  
427 *ONE.* (2017), doi: 10.1371/journal.pone.0188487.
- 428 23. Liang Chi, Xiaoming Bian, Bei Gao, Pengcheng Tu, Hongyu Ru, Kun Lu, The  
429 Effects of an Environmentally Relevant Level of Arsenic on the Gut Microbiome and



- 430 Its Functional Metagenome, *Toxicological Science*. 160 (2017) 193–204,  
431 <https://doi.org/10.1093/toxsci/kfx174>.
- 432 24. P.C. Kashyap, A. Marcobal, L.K. Ursell, M. Larauche, H. Duboc, K.A. Earle, E.D.  
433 Sonnenburg, J.A. Ferreyra, S.K. Higginbottom, M. Million, Y. Tache, P.J. Pasricha,  
434 R. Knight, G. Farrugia, J.L. Sonnenburg, Complex interactions among diet,  
435 gastrointestinal transit, and gut microbiota in humanized mice, *Gastroenterology*. 144  
436 (2013) 967–977, DOI: 10.1053/j.gastro.2013.01.047.
- 437 25. K. Gokulan, M.G. Arnold, J. Jensen, M. Vanlandingham, N.C. Twaddle, D.R. Doerge,  
438 Cerniglia. Sangeeta Khare, Exposure to arsenite in CD-1 mice during juvenile and  
439 adult stages: effects on intestinal microbiota and gut-associated immune status,  
440 *American Society for Microbiology*. (2018) 01418-18,  
441 **DOI:** 10.1128/mBio.01418-18.
- 442 26. S. Viaud, F. Saccheri, G. Mignot, T. Yamazaki, R. Daillère, D. Hannani, D.P. Enot, C.  
443 Pfirschke, C. Engblom, M. J. Pittet, A. Schlitzer, F. Ginhoux, L. Apetoh, E. Chachaty,  
444 P.L. Woerther, G. Eberl, M. Bérard, C. Ecobichon, D. Clermont, C. Bizet, V.  
445 Gaboriau-Routhiau, N. Cerf-Bensussan, P. Opolon, N. Yessaad, E. Vivier, B. Ryffel,  
446 C.O. Elson, J. Doré, G. Kroemer, P. Lepage, I.G. Boneca, F. Ghiringhelli, Zitvogel,  
447 The intestinal microbiota modulates the anticancer immune effects of  
448 cyclophosphamide, *Science*. 342 (2013) 971–976, DOI: 10.1126/science.1240537.
- 449 27. Mireia, Uribe-Herranz, Kyle Bittinger, Stavros Rafail, Sonia Guedan, Stefano Pierini,  
450 C. Tanes, A. Ganetsky, M.A. Morgan, S. Gill, J.L. Tanyi, F.D. Bushman, C.H. June,  
451 A. Facciabene, Gut microbiota modulates adoptive cell therapy via CD8 $\alpha$  dendritic  
452 cells and IL-12. *JCI Insight*. 22 (2018) 3(4) doi: 10.1172/jci.insight.94952.
- 453 28. Y. Belkaid, T.W. Hand, Role of the microbiota in immunity and inflammation, *Cell*.  
454 (2014) 121-41, DOI: 10.1016/j.cell.2014.03.011.
- 455 29. K.Smith, K.D. McCoy, A.J. Macpherson, Use of axenic animals in studying the  
456 adaptation of mammals to their commensal intestinal microbiota, *Semin Immunol*. 19  
457 (2007) 59-69, DOI: 10.1016/j.smim.2006.10.002.

- 458 30. M.T. Abreu, Toll-like receptor signalling in the intestinal epithelium: how bacterial  
459 recognition shapes intestinal function, *Nat Rev Immunol.* 10 (2010) 131–144, DOI:  
460 10.1038/nri2707.
- 461 31. C. Vanderpool, F. Yan, D.B. Polk, Mechanisms of probiotic action: Implications for  
462 therapeutic applications in inflammatory bowel diseases, *Inflamm Bowel Dis.* 14  
463 (2008) 1585–1596, DOI: 10.1002/ibd.20525.
- 464 32. Fleming Chris. Yihua Cai. Xuan Sun. R. Venkatakrishna, Jala Feng, Samantha  
465 Morrissey, Yu-ling Wei, Yueh-hsiu Chien, Huang-ge Zhang, Bodduluri Haribabu,  
466 Jian Huang, Jun Yan, Microbiota-activated CD103+ DCs stemming from microbiota  
467 adaptation specifically drive  $\gamma\delta$ T17 proliferation and activation, *Microbiome*,  
468 (2017)5:46, <https://doi.org/10.1186/s40168-017-0263-9>.
- 469 33. Vivek Subbiah, Ravi Murthy, , S. David, M. Hong Robert, Prins Chitra Hosing, Kyle  
470 Hendricks, Deepthi Kolli, Lori Noffsinger, Robert Brown, Mary McGuire, Siquing  
471 Fu, Sarina Piha-Paul, Aung Naing, P. Anthony, S. Conley Robert, Benjamin,  
472 Indreshpal Kaur, L. Marnix, Bosch, Cytokines Produced by Dendritic Cells  
473 Administered Intratumorally Correlate with Clinical Outcome in Patients with  
474 Diverse Cancers, *Clin Cancer Res.* (2018) 24 (16),  
475 <https://doi.org/10.1158/1078-0432.CCR-17-2707>.
- 476 34. F.V, Durães, N.B. Carvalho, T.T. Melo, S.C. Oliveira, C.T. Fonseca, IL-12 and  
477 TNF- $\alpha$  production by dendritic cells stimulated with *Schistosoma mansoni*  
478 schistosomula tegument is TLR4- and MyD88-dependent, *Immunology Letters.*  
479 (2009) 72-77, DOI: [10.1016/j.imlet.2009.06.004](https://doi.org/10.1016/j.imlet.2009.06.004).
- 480 35. M. Feia, S. Bhatia, T.B. Oriss, M. Yarlagadda, A. Khare, S. Akira, S. Saijo, Y.  
481 Iwakura, B.A. Fallert Junecko, T.A. Reinhart, O. Foreman, P. Ray, J. Kolls, A. Ray,  
482 TNF- $\alpha$  from inflammatory dendritic cells (DCs) regulates lung IL-17A/IL-5 levels  
483 and neutrophilia versus eosinophilia during persistent fungal infection, *Proc Natl*  
484 *Acad Sci U S A.* 108 (2011) 5360-5365, DOI: 10.1073/pnas.1015476108.

- 485 36. B. De Saint-Vis, I. Fugier-Vivier, C. Massacrier, Claude Gaillard, Béatrice,  
486 Vanbervliet, Smina Aït-Yahia, Jacques Banchereau, Yong-Jun Liu, Serge Lebecque,  
487 Christophe Caux, The cytokine profile expressed by human dendritic cells is  
488 dependent on cell subtype and mode of activation, *J Immunol.* 160 (1998) 1666-1676,  
489 <http://www.jimmunol.org/content/160/4/1666>.
- 490 37. T. Ohteki, T. Fukao, K. Suzue, C. Maki, M. Ito, M. Nakamura, S. Koyasu,  
491 Interleukin-12 dependent interferon-g production by CD8a1 lymphoid dendritic cells,  
492 *J Exp Med.* 189 (1999) 1981-1986, DOI: 10.1084/jem.189.12.1981.
- 493 38. T. Fukao, S. Matsuda, S. Koyasu, Synergistic effects of IL-4 and IL-18 on  
494 IL-12-dependent IFN-g production by dendritic cells, *J Immunol.* 164 (2000) 64-71,  
495 DOI: 10.4049/jimmunol.164.1.64.
- 496 39. Pierre Miossec, Dynamic interactions between T cells and dendritic cells and their  
497 derived cytokines/chemokines in the rheumatoid synovium, *Arthritis Research &*  
498 *Therapy.* (2008), doi: 10.1186/ar2413.
- 499 40. R.J. Xavier, D.K. Podolsky, Unravelling the pathogenesis of inflammatory bowel  
500 disease, *Nature.* 448 (2007) 427-434, DOI: 10.1038/nature06005.
- 501 41. M.G. Neuman, Immune dysfunction in inflammatory bowel disease, *Transl Res.* 149  
502 (2007) 173–86, DOI: 10.1016/j.trsl.2006.11.009.
- 503 42. J. Terzic, S. Grivennikov, E. Karin, M. Karin, Inflammation and colon cancer,  
504 *Gastroenterology.* 138 (2010) 2101-2114, DOI: 10.1053/j.gastro.2010.01.058.
- 505 43. L. Kristina, Bondurant, Abbie Lundgreen, S. Jennifer, Herrick, Susan Kadlubar, K.W.  
506 Roger, L. Martha, Slattery, Interleukin genes and associations with colon and rectal  
507 cancer risk and overall survival. *Int. J. Cancer.* 132 (2012) 905–915,  
508 doi: [10.1002/ijc.27660](https://doi.org/10.1002/ijc.27660).
- 509 44. F. Sanchez-Munoz, A. Dominguez-Lopez, J.K. Yamamoto-Furusho, Role of  
510 cytokines in inflammatory bowel disease, *World J Gastroenterol.* 14 (2008) 4280–8,  
511 DOI: 10.3748/wjg.14.4280.

- 512 45. Shilpa Keerthivasan, S. Keerthivasan, K. Aghajani, M. Dose, L. Molinero, M.W.  
513 Khan, V. Venkateswaran, C. Weber, A.O. Emmanue, T. Sun, D.J. Bentrem, M.  
514 Mulcahy, A. Keshavarzian, E.M. Ramos, N. Blatner, K. Khazaie, F. Gounari,  
515  $\beta$ -catenin Promotes Colitis and Colon Cancer Through Imprinting of  
516 Proinflammatory Properties in T Cells, *Sci Transl Med.* 26; 6 (2014) 225 ra 28, DOI:  
517 10.1126/scitranslmed.3007607.
- 518 46. Chiranjeevi Tikka, Ram Kumar Manthari, Mohammad Mehdi Ommati, Ruiyan Niu,  
519 Zilong Sun, Jianhai Zhang , Jundong Wang. Immune disruption occurs through  
520 altered gut microbiome and NOD2 in arsenic induced mice: Correlation with colon  
521 cancer markers. *Chemosphere* 246 (2020) 125791.  
522 <https://doi.org/10.1016/j.chemosphere.2019.125791>.

**Figure-1**

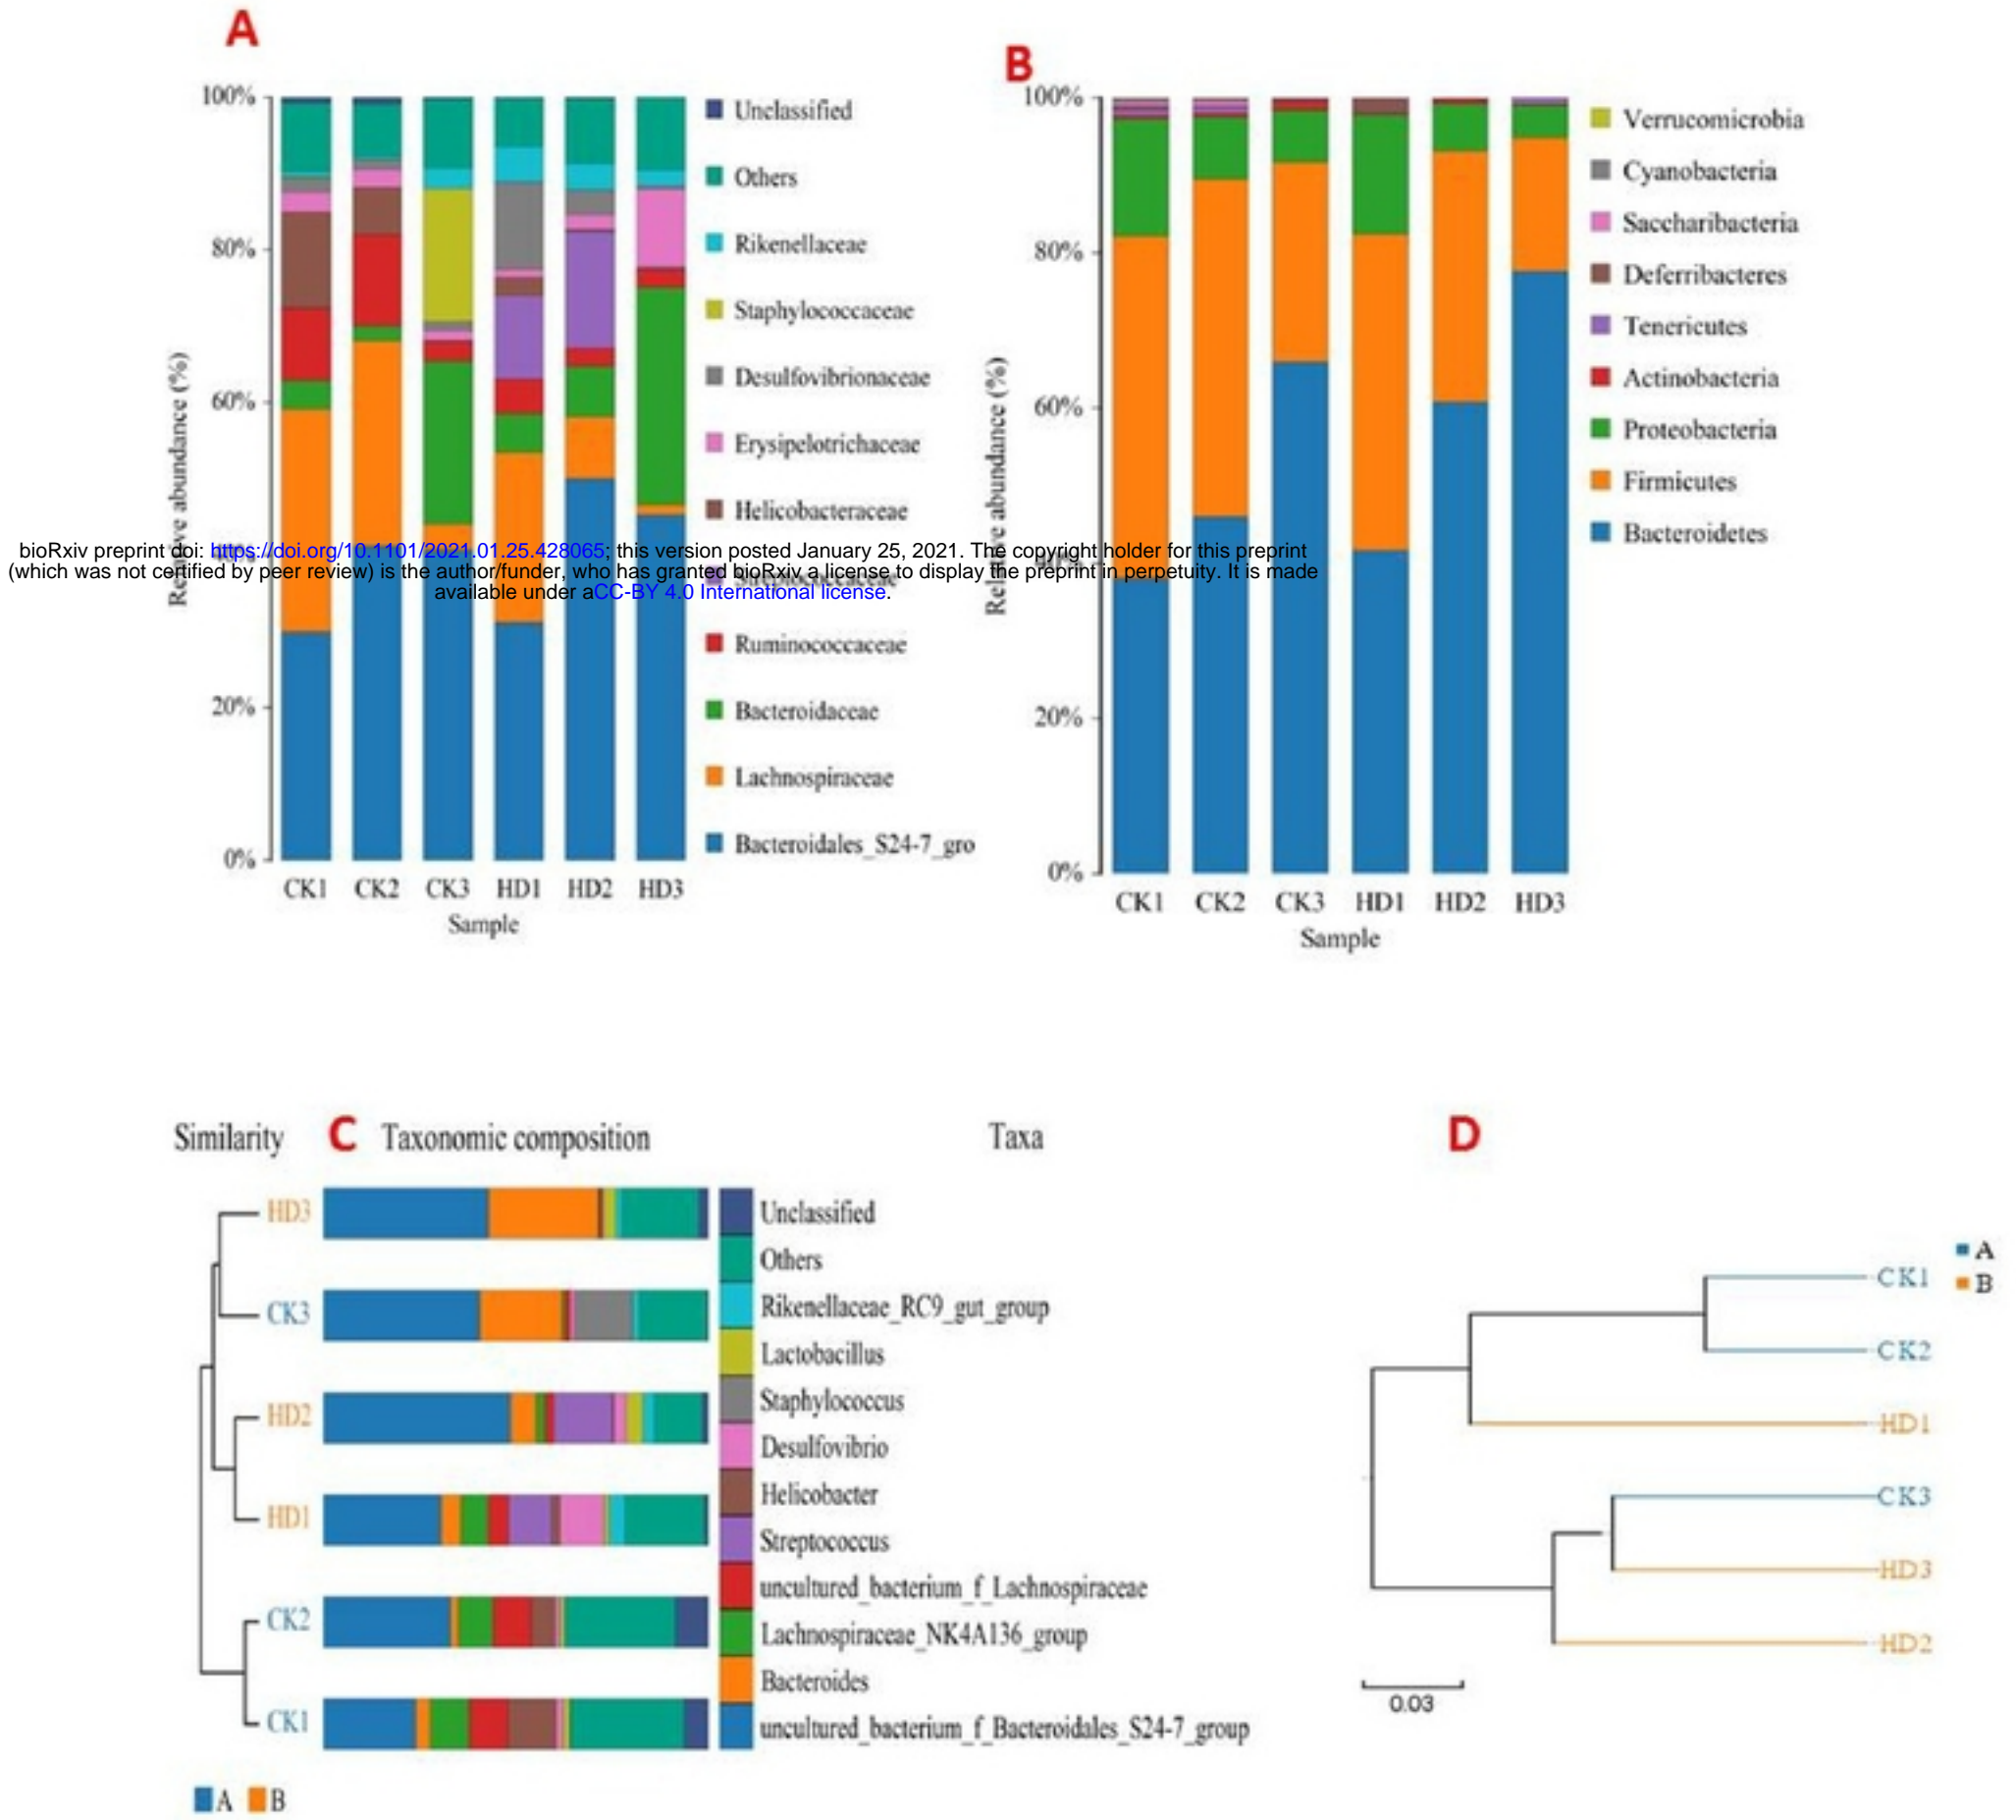



bioRxiv preprint doi: <https://doi.org/10.1101/2021.01.25.428065>; this version posted January 25, 2021. The copyright holder for this preprint (which was not certified by peer review) is the author/funder, who has granted bioRxiv a license to display the preprint in perpetuity. It is made available under aCC-BY 4.0 International license.

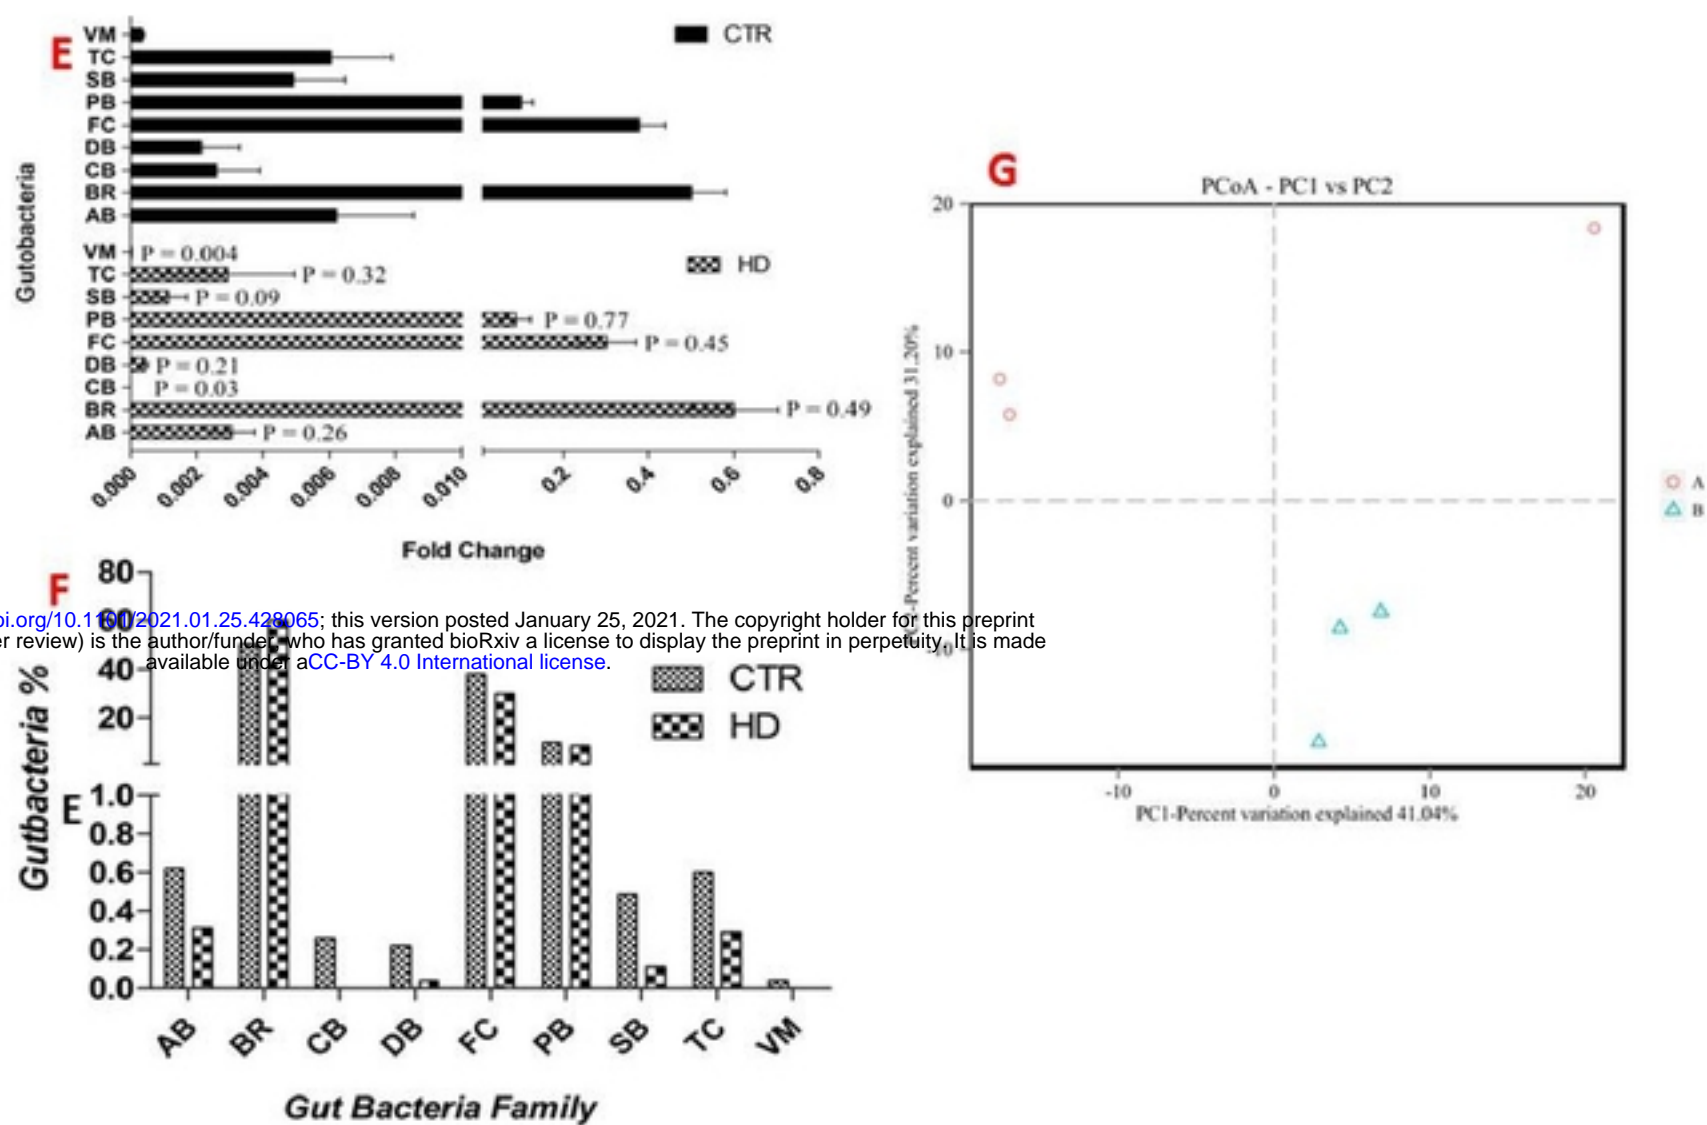

**Figure-1.** A). Both in control and treated gut microbiome profile evaluated through the 16S rRNA sequencing each color indicating their individual bacterial family (CK= Control; HD= High dose). B). Showing gut bacterial abundance at phylum level. C). The gut bacteria showing taxonomical view. D). the tree both in control and treatment created with 0.03 distance by UPGMA E). Fold changes of gut bacteria showing significant changes of gut bacteria in arsenic treated mice in contrast to controls groups each color indicating specific bacteria at phylum level F). Graph showing the percentage (%) of gut bacteria in both control and As treated animals G). The alteration of gut microbiome in control and arsenic-treated mice varied by PCA circle shape indicating in red color (Control=A) Arsenic high dose, indicating blue color (High dose= B)(Ab=*Actinobacteria*, Br=*Bacteroidetes*, Bb=*Cyanobacteria*, Db=*Deferribacteres*, Fc=*Firmicutes*, Pb=*Proteobacteria*, Sb=*Saccharibacteria*, Tc=*Tenericutes*, Vm=*Verrucomicrobia*).

**Figure-2**

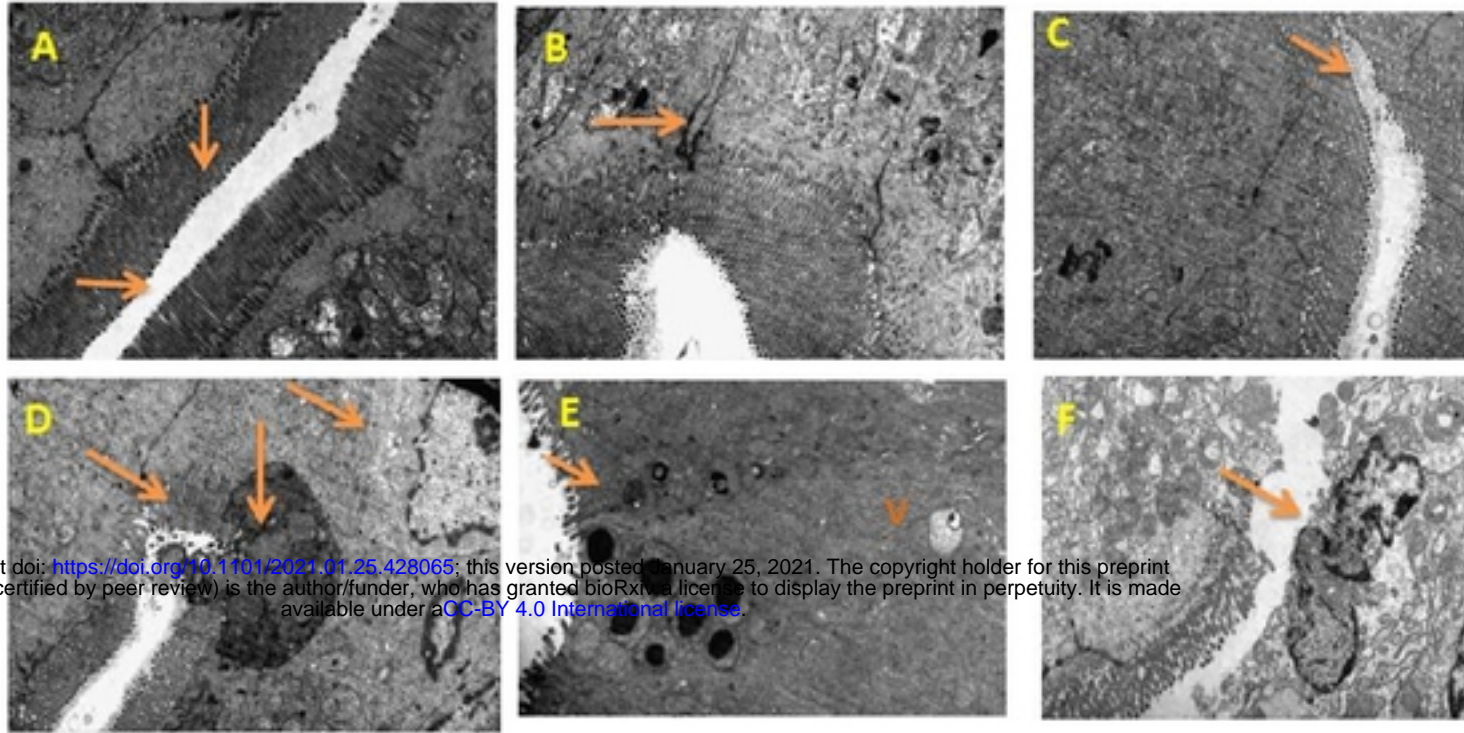

bioRxiv preprint doi: <https://doi.org/10.1101/2021.01.25.428065>; this version posted January 25, 2021. The copyright holder for this preprint (which was not certified by peer review) is the author/funder, who has granted bioRxiv a license to display the preprint in perpetuity. It is made available under aCC-BY 4.0 International license.

**Figure-2.** TEM micrograph showing: **A.** Intestinal epithelial cells and villi in control mice. **B.** Dendritic cell migrate to embedded epithelial cells in high dose. **C.** Dendritic cell trying to engulf the Microbial pathogens in high dose mice intestine. **D.** Pathogenic bacteria entered through embedded epithelial cells. **E.** Bacteria encapsulated with vacuole in high dose. **F.** Inflammation formed in epithelial layer of small intestine.



**Figure-3**

bioRxiv preprint doi: <https://doi.org/10.1101/2021.01.25.428065>; this version posted January 25, 2021. The copyright holder for this preprint (which was not certified by peer review) is the author/funder, who has granted bioRxiv a license to display the preprint in perpetuity. It is made available under aCC-BY 4.0 International license.

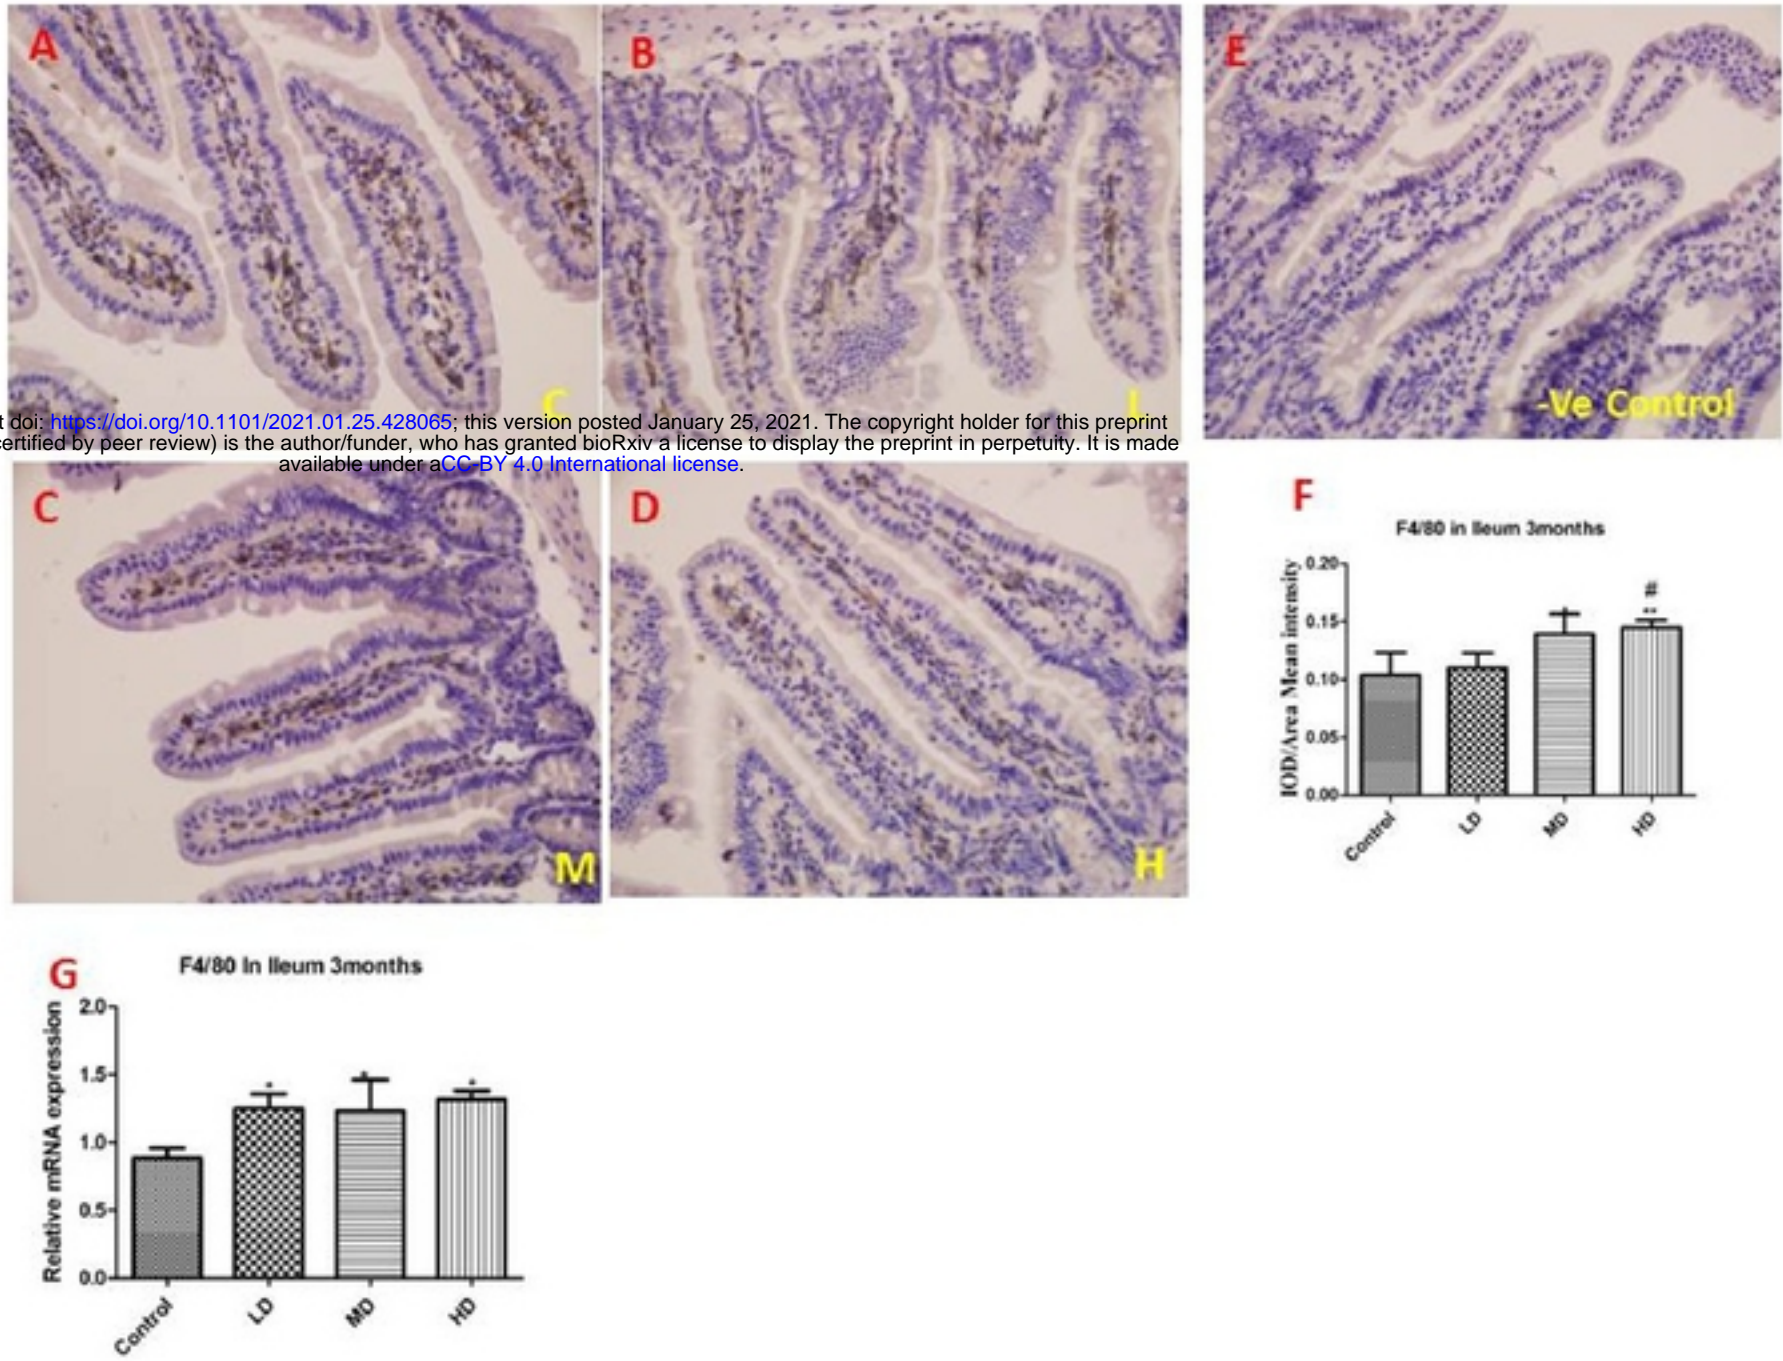

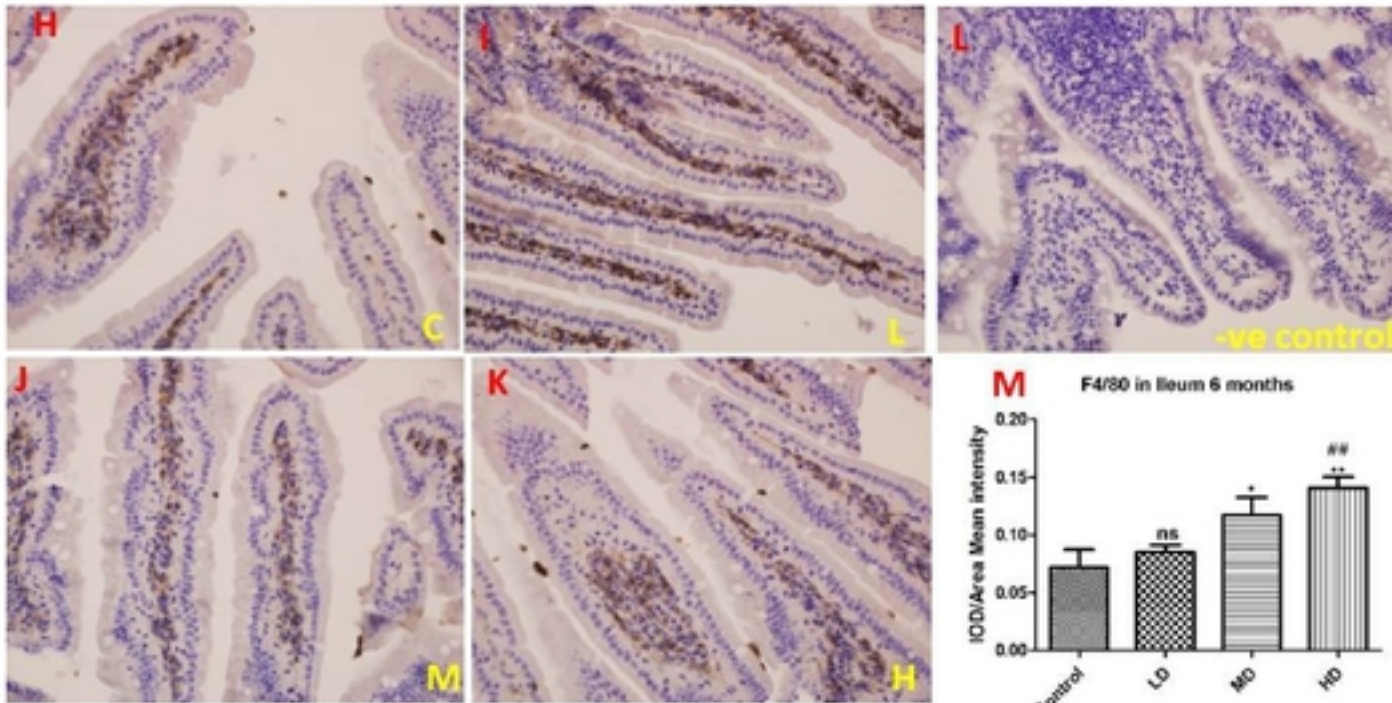

bioRxiv preprint doi: <https://doi.org/10.1101/2021.01.25.428065>; this version posted January 25, 2021. The copyright holder for this preprint (which was not certified by peer review) is the author/funder, who has granted bioRxiv a license to display the preprint in perpetuity. It is made available under aCC-BY 4.0 International license.

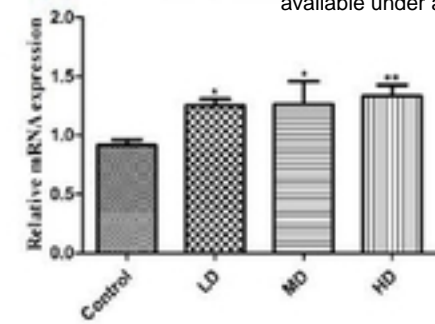

**Figure-3.** Immuno histochemistry revealed F4/80 intensity, location and expression in 3months Ileum [A indicates Control, B indicates Low dose, C indicates Medium dose, D indicates High dose, E indicates Negative control, F indicates F4/80 protein intensity, G indicates Relative mRNA expression level of F4/80], arsenic treated group (LD, MD and HD) compared with control group. In 6months Ileum [H- Control; I-Low dose group; J-Medium dose group; K-High dose group; L- Negative control; M-F4/80 protein intensity; N-Relative mRNA expression level of F4/80].



**Figure-4**

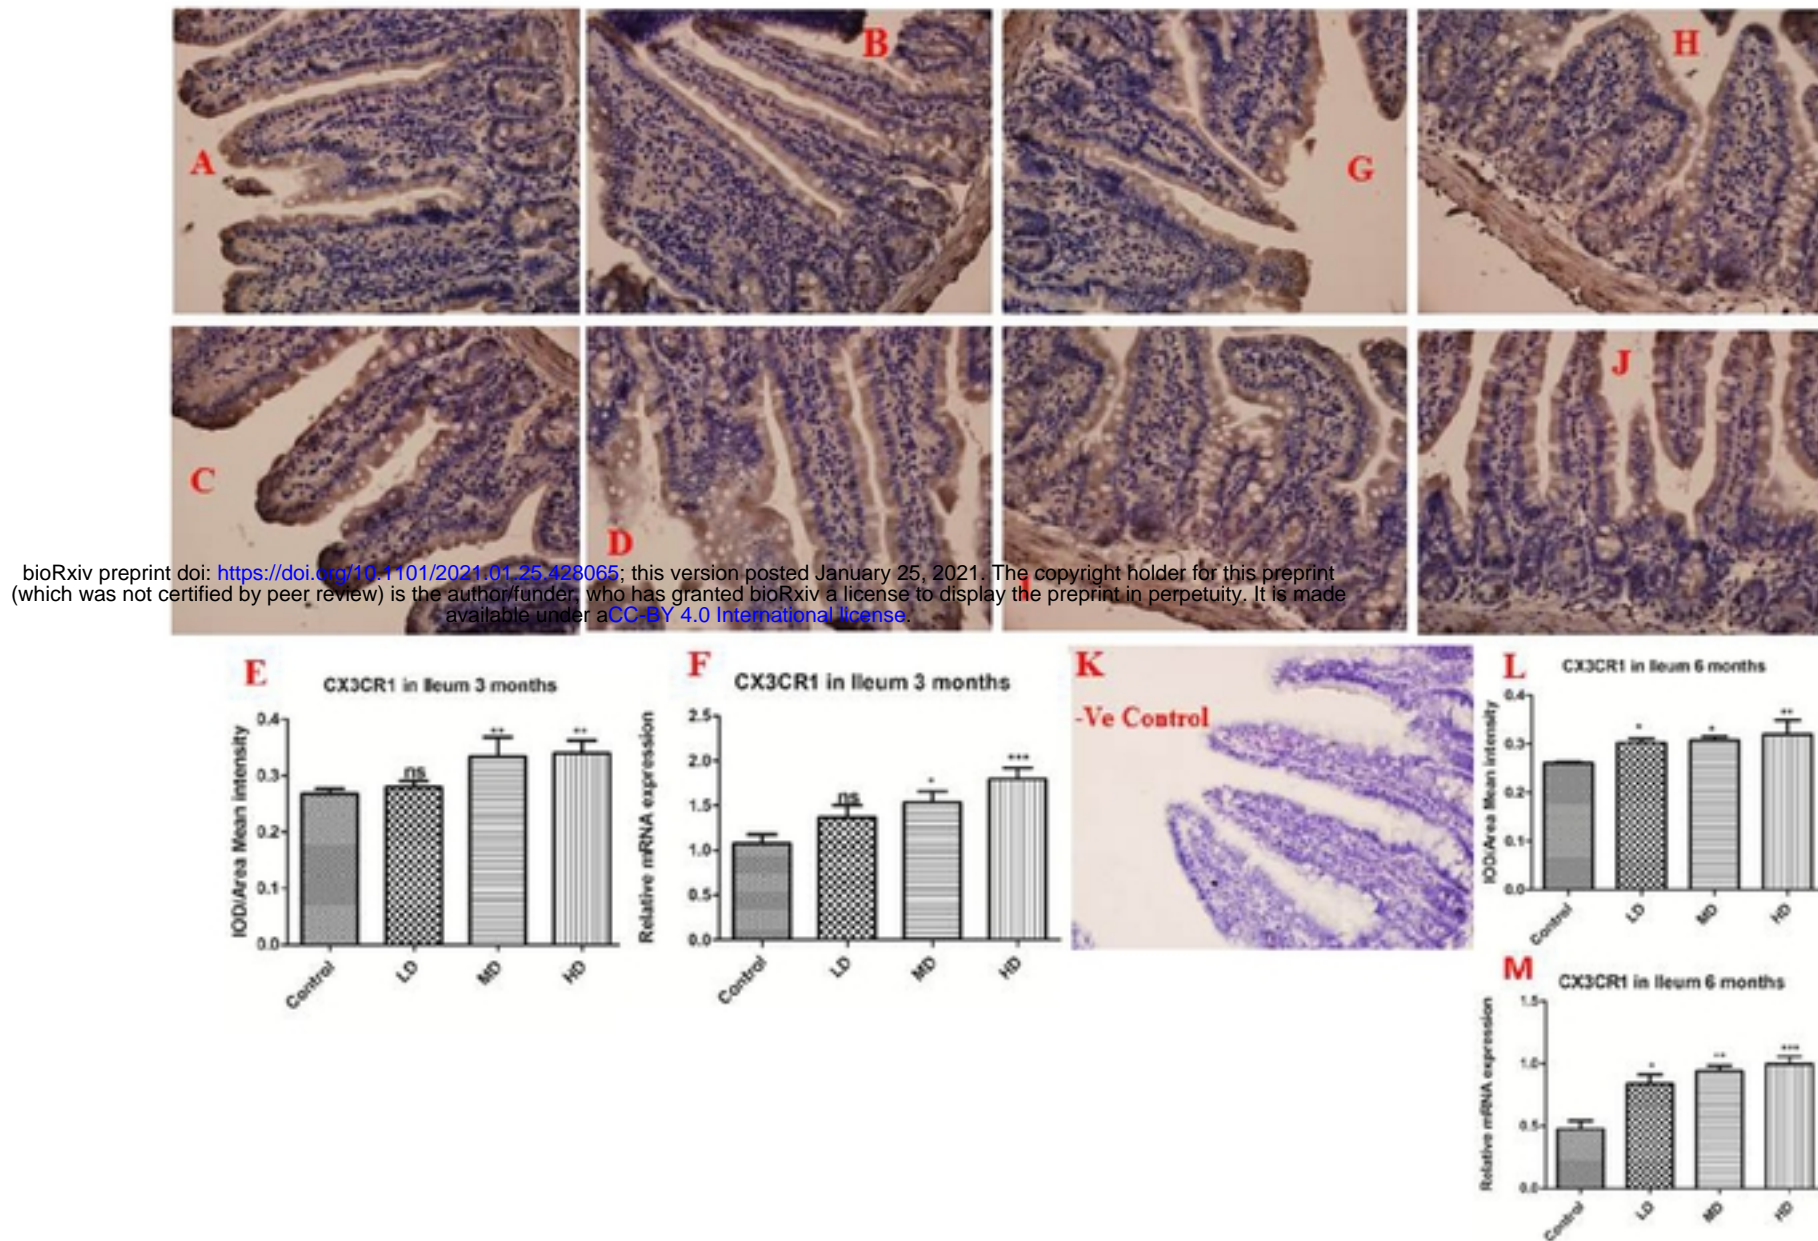

**Figure-4.** In 3 months Ileum [A-Control, B-Low dose group, C-Medium dose group, D-High dose group, E-CX3CR1 protein intensity bar graph], F). Impact of arsenic on relative mRNA level of CX3CR1 in Intestinal epithelium of Ileum 3 months. The intensity of protein were estimated in arsenic treated groups (LD, MD and HD) and compared with control group. **In 6 months Ileum** [G- Control; H-Low dose group; I-Medium dose group; J-High dose group; L-CX3CR1 protein intensity bar graph, K- Negative control], M. Effects of arsenic on relative mRNA level of CX3CR1 in Intestinal epithelium of Ileum 6 months. Treated groups (LD, MD and HD) and compared with control group.

**Figure-5**

bioRxiv preprint doi: <https://doi.org/10.1101/2021.01.25.428065>; this version posted January 25, 2021. The copyright holder for this preprint (which was not certified by peer review) is the author/funder, who has granted bioRxiv a license to display the preprint in perpetuity. It is made available under aCC-BY 4.0 International license.

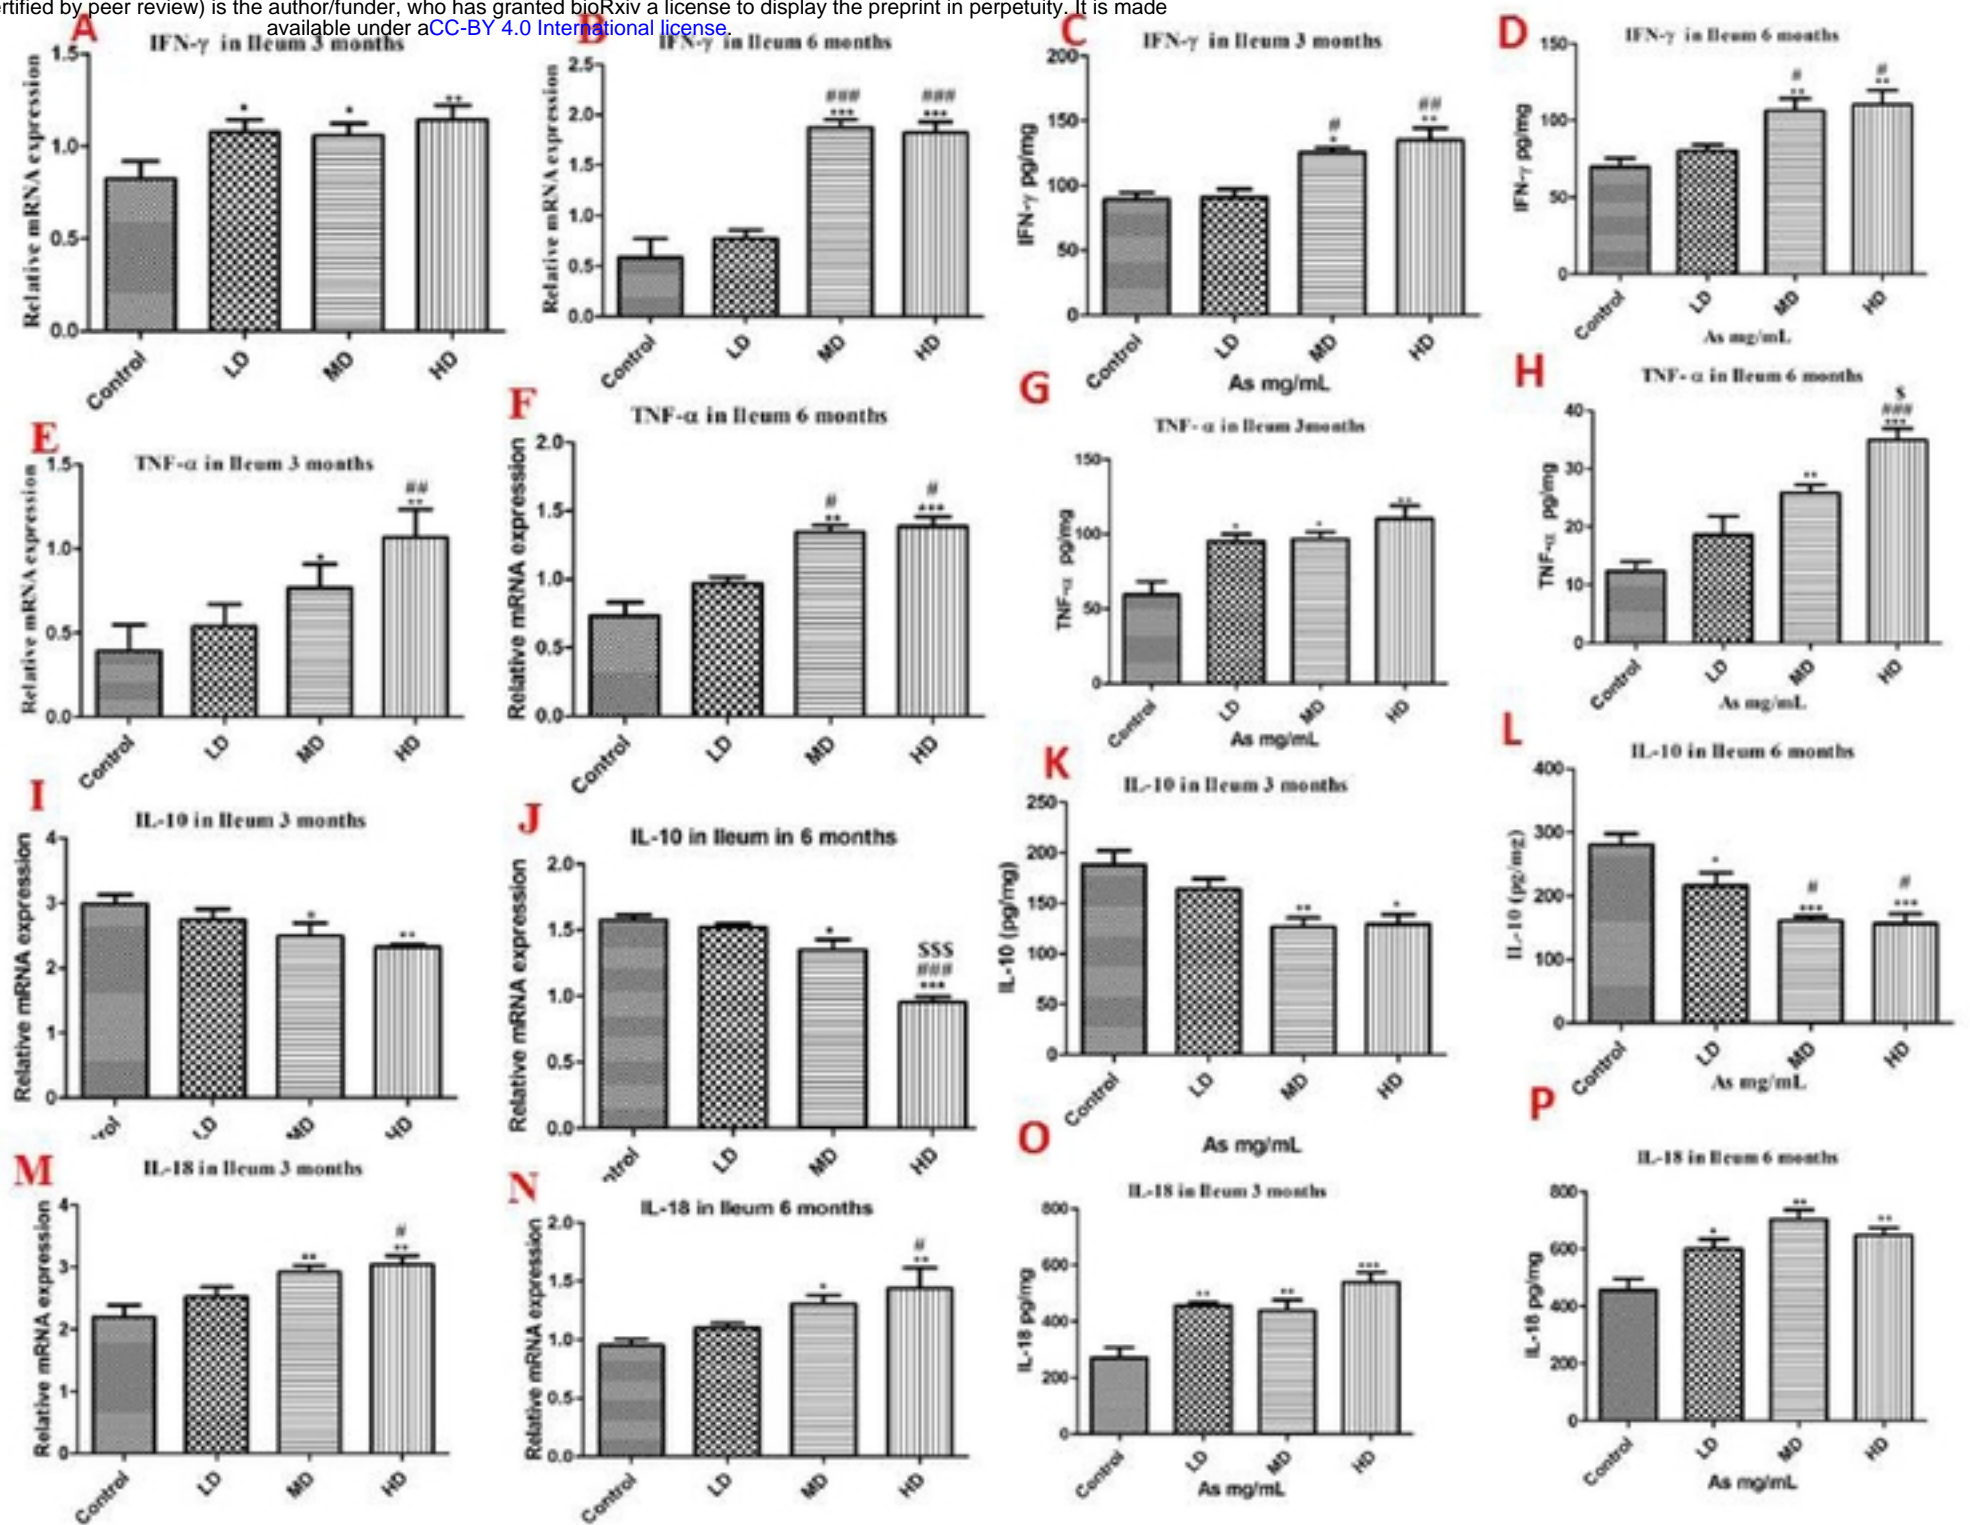



**Figure-5. Effects of As on relative mRNA expression levels of Intestinal epithelial cells of Ileum in 3 months and 6 months As exposure and Control groups. A, B** bar graphs show relative mRNA expression levels **C, D** indicates protein levels of IFN $\gamma$  in 3 and 6 months As exposure male mice respectively. **E, F.** graph show relative mRNA expression levels **G, H** indicates protein levels of TNF- $\alpha$  in 3 months and 6 months As exposure male mice respectively. **I, J.** Graph show relative mRNA expression levels **K, L** indicates protein levels of IL-10 in 3 and 6 months As exposure male mice respectively. **M, N.** Bar-graph show relative mRNA expression levels **O, P** bar-graph indicates protein levels of IL-18 in 3 and 6 months As exposure male mice respectively. Data represent the mean $\pm$ SEM (n=6). Asterisk (\*) indicates significant difference compared to the control group (\*p < 0.05; \*\*p<0.01), Hash (#) indicates significant difference compared to the low dose group (#p < 0.05; ##p<0.01) and dollar (\$) indicates significant difference compared to the medium dose group (\$p < 0.05; \$\$p<0.01) and lack of symbol on any of the bar, except control group, represents non-significant with their respective compared group. LD: low dose, MD: medium dose, HD: high dose.

bioRxiv preprint doi: <https://doi.org/10.1101/2021.01.25.428065>; this version posted January 25, 2021. The copyright holder for this preprint (which was not certified by peer review) is the author/funder, who has granted bioRxiv a license to display the preprint in perpetuity. It is made available under aCC-BY 4.0 International license.
